# Supplementary material for: Effectiveness of Long-acting Trimetazidine in Different Clinical Situations in Patients with Stable Angina Pectoris: Findings from ODA Trial
Source: PubMed Central journal article supplement — Cardiol Ther. 2019 Feb 18;8(1):69–78. doi: 10.1007/s40119-019-0128-3 (PMC6525211; doi:10.1007/s40119-019-0128-3), 2019-02-18
Supplement: 40119_2019_128_MOESM1_ESM.pdf [file 40119_2019_128_MOESM1_ESM.pdf]

## ODA Study Investigators

Nekrasova E. L. Khlopina, I. A., Nubret K. S., Agafonova Y. A., Ternavsky S. P., (Arkhangelsk), Bardukova O. V., Kutyakova N. M. Berestennikova Y.V., Ustyugova, V. V., Filatova T. A., Khalturina I. G., (Barnaul), Ishchenko, K. A., Karutskaja O. A., Panikar, V. I., Bolkhovitina O. A., Bondarev E. I., Eremin, I. N., (Belgorod), Kadashova S. I., Frolova O. M., Petukhova I. L., (Bryansk), Suvorov A. V., Zhuchkova Y.V., (Velikiy Novgorod), Kuhl M. A., Rodionova L. V., Musurok T. P., (Vladivostok), Ivkova I. A., Ermakov A.S., Stukalova E. M., (Vladimir), Chumakov V. N., Rubezhanskaja E.Y., Kotlova A. A., Pushkareva A. V., Dmitrieva L. V., Bel'kina E. V., Solov'eva O. E., Panyulaytenene S. L., Sarkisyan O. G., (Volgograd), Konovalova G. V., Kuznetsova S. S., Nikolaeva S. V., (Vologda), Trubitsyna I. V., Alekseeva O. A., Kozmina M. E., Babautseva N. A. Kochetkova I. V., Anokhin A. A., Vovk E. V. (Voronezh), Buyko, A. N., Malahatka E. S., Iskra M. A., Shilonosov S. N., Moiseenko G. V., Tomm, Y. S., Stopyatuk N. A. Grigorieva E. G. (Yekaterinburg), Zaitseva A. A., Zaitseva N. A. Sirotkina I. A. (Ivanovo), Kiyanchenko, R. L., Grigoriev S. P., Medvedeva N. V. (Izhevsk), Svatkov M. Y., Golubeva L. V., Kozhevnikova L. A., Chernova A. A., Dolbilkin A. Y., Palvinskaya A.Y., Baranova T. V., Habeeva T. S., Khodus D. A., Ermolaeva G. N., Arbatskaja I. V. (Irkutsk), Idiatullina V. R., Egorova M. E, Galimova I. R., Kuklina M. V., Mamatadzhiev A. A., Rahmatullina R. N., Kim Z. F., Stepanova V. S. (Kazan), Gerr I. E., Levchenko G. I., (Kaliningrad), Dubinkina S. E., Zoob R. A., Krokhal, O. N., (Kaluga), Lisina S. V., Kudryavtseva N. G., Sitnikov D. V., Lunegov D. G., Evdokimova N. A. Ivanova I. V., (Kemerovo), Manilova A.V., Bessergeneva O. L., Mokhova E. E., (Kirov), Kulchytska O. V., Shulikina O. V., Ananenko V. G., Ivanova O. T. (Krasnodar), Alentyeva M. D., Didur M. E., Zemzyulina K. A., Kartina N. P. Kapustina I. A., Skurikhina N. N., Novoselova G. I., Gracheva T. A., Shiryaev I. V., Avdeeva, O. V., Fedorova O. S., (Krasnoyarsk), Filatkina E. A., Pankova N. V. Mikhailova A.V., (Kursk), Samoilenko T. V. Zhurkina N. V. Riazantseva E. N., (Lipetsk), Mokrousova, L. V., Kulieva A. Z., Rychkova, T. N., (Moscow), Skripka T. A., Krasnevich S. Y., Fedorova L. F., Abdalova S. A., Tremaskina M. S., Mushaeva Z. N., Sladkova T. A., Gabisova P. S., Kononova T. V., Maslova V. V., Kazakova A. N., Khamitsaeva E. O., Ratnikova O. S., Ivanova N. A. Savel'eva E. V., Obikhodova I. V., Puakseva G. I., Gunin, A. A., Skvortsova I. Y., Chugunova I. I., Shestopalova N. A. Kutina, O. A., Ponomareva Y. V., Nikolina T. P., Sokolova S. I., Fastovshchuk T. N., Pak, L. I., Kazaryan A.S. Sabitova O. V., Kuznetsova T. V., Kudzaeva Z. K., Pomiluyko A. A., Kudryavtsev A. V., Gabaraeva T. M., Titova, E. A., Levtsova E. A., Faiman, N.I., Chernomorets V. V., Evseeva O. A., Lopata N.S. Lobankova L. A., Komarova O. V., Tsybulnikova E. M., Kutz, O. A., Kalimeeva O. S., Nudikova I. G., Chibrikina M. V., Sarkisova K. A., Kalakova R. V., Erezeeva N. V. Shirganova G. S., Chmil A. A., Kafanova M. S., Ermolaeva S. V., Koshroikova R. A., Orozalieva G. M., Barnashova E. S., Akhadov S. V., Podmoskova E. V., (Moscow and Moscow region), Borisova A. B., Chirkunova E. V., Chernova, T. A., (Naberezhnye Chelny), Kosova N. V. Guseva O. V., Kuzovkova, S. A., Mulin, I. V., Larina O. V., Mingaleva, S. V., Tsvetkova L. A., Vysotskaja I. K., Degtereva, T. Y., (Nizhny Novgorod), Reshetova L. I., Koblyakova I. I. Chigisova A. N., (Novokuznetsk), Krivenko L. A., Matveeva M. A., Kozlova L. A., Yakhontova O. O., Musina G. R., Kuznetsova E. A. (Novosibirsk), Adamov V. I., Podolnaya, S. P., Mukhin A. V., Giley I. A., Savelyeva N. M. (Omsk), Novikova A. V., Makhonina Y. N., Shemetova T. S., (Orel), Tarasova L. V., Galushko I. V., Nasakina L. I., (Orenburg), Chaadaeva, M. I., Grechishkina O. A., Hamrina G. A., (Penza), Oshchepkova O. V., Senina S. D., Graf, E. B., Kozhevnikova I. M., Lukina S. F., Vinokurova E. V., Sobol A. T., Nevolina N. K., Zdankovich O. T., (Perm), Luzhnova Z. N., Mamedova A. A., (Pskov), Osipova V. A., Zheltova V. L., Shahramanyan L. N., (Pyatigorsk), Bulygina E. D., Panchenko N. N., Tolstokoneva T. P., Batalo G. V., Mazrukho M. K., Chepurnenko S. A. (Rostov-on-don), Alexandrova N. I. Starostina N. N., Grushetskaya, I. S. (Ryazan), Novikova O. Y.,

Krylova O. A., Arhipova L. V., Kostomarova S. V., Khudyakova O. V., Nasyrova M. A., Yakimova N. N., Kositsyna G. V., Ovchinnikova, E. A., Ryazanova E. I., Kuzmin V. P., (Samara), Basharin A. D., Bulycheva L. V., Soesheva A. R., Timaeva G. R., Burenina N. K., Nikolov N. I. Udaltsova I. V., Zhenihova Z. M., Pukhova E. S. And Shmeleva E. A., Luchko A. I., Ermolenko A. M., Melekhova E. Y., Kadyseva Y. V., Nechvolod E. V., Al-Atar, E. M., Sereda E. J., Grigorieva N. A. Algina, V. G., Borisov A. E., Sabolova Z. S., Novozhenina A. Y., Silantyeva L. A., Litsis N. N., (Saint Petersburg), Gamayunova N. V., Velikanova E. E., Gulyaeva N. Y., Zhuravleva O. A., Chichvarina E.G., Kalinina E.G., Bidzhieva O. S., Vasilieva N. V. Novokreschenova N. V. (Saratov), Osmanova G. R., Lugovtsova S. L., Gadomskaya E. N., (Sevastopol), Pastukhova E. A., Krapivina L. V., Kireeva I. B., (Simferopol), Mironova E. E.B., Nikiforova O. G., Vorfolomeeva A. E., (Smolensk), Orekhova E. I., Evdokimova O. K., (Sochi), Naumova E. A., Shtets A. V., Novikova M. V., Moiseeva L. F., Larina O. I., Trusilkina V. N., (Stavropol), Arinushkina E. A., Manokhin P. V., Sotnikova, T. A., (Stary Oskol), Khazova M. P., Gubareva E. P., Gladysheva Y. I. (Tambov), Khalikova M. D., Bochkareva O. S., Andreeva O. V., (Tver), Dmitrieva N. V. Maklakova M. P., Kapustina L. A., (Tolyatti), Kuzmina I. Y., Mzhelskaya A. A., Demenko, L. P., (Tomsk), Yunusova K.I. Strunevskaya Y. V., Tkacheva O. M., (Tula), Dehont L. Y., Kulikova Y. I., Nadtochiy, T. A., (Tyumen), Harrasova G. Z., Ueldanov U. R., Akhmametyeva Y. N., Badykova E. A., Zainitdinova D. R., Timerbulatov T. R., Zaerova L. M., Nurlygayanova A. M., Vardikyan A. G. (Ufa), Zhukova M. V., Zhuravleva E.G., Sabanina E. N., (Khabarovsk), Pogodina, T. N., Cherepanova N. A., Zakhezina L. V., Petrov V. G., Charykova I. V. (Chelyabinsk), Chinkova V. A., Kuritsyna A. A., Kos'kina A. A. (Yaroslavl).
